# Supplementary material for: Identification of distinct functional thymic programming of fetal and pediatric human γδ thymocytes via single-cell analysis
Source: PubMed Central journal article supplement (PMC9532436; doi:10.1038/s41467-022-33488-2), 2022-10-04
Supplement: 41467_2022_33488_MOESM3_ESM.pdf [file 41467_2022_33488_MOESM3_ESM.pdf]

**Supplementary Data 1:** List of DGE of the different  $\gamma\delta$  clusters of the fetal thymus dataset.

**Supplementary Data 2:** List of DGE of the immature-maturing and effector fetal  $\gamma\delta$  thymocyte populations.

**Supplementary Data 3:** List of DGE of the Type 1,3 and 2-like fetal  $\gamma\delta$  thymocyte populations.

**Supplementary Data 4:** List of DGE of the different  $\gamma\delta$  clusters of the paediatric thymus dataset.

**Supplementary Data 5:** Lists of markers used to compute module scores.
